# Supplementary material for: Manganese dissolution in alkaline medium with and without concurrent oxygen evolution in LiMn2O4
Source: Royal Society of Chemistry journal article supplement (doi:10.1039/d3ya00434a), 2024-01-01
Supplement: d3ya00434a1.pdf [file d3ya00434a1.pdf]

## Supporting Information

# Manganese Dissolution in alkaline medium with and without concurrent oxygen evolution in $\text{LiMn}_2\text{O}_4$

*Omeshwari Bisen<sup>¶†</sup>, Max Baumung<sup>¶†</sup>, Michael Tatzel<sup>‡</sup>, Cynthia A. Volkert<sup>‡</sup>, Marcel Risch<sup>¶†\*</sup>*

<sup>†</sup> Institute of Materials Physics, University of Göttingen, Friedrich-Hund-Platz 1, 37077  
Göttingen, Germany.

<sup>‡</sup> Dept. of Sedimentology & Environmental Geology, University of Göttingen,  
Goldschmidtstr. 3, 37077 Göttingen, Germany.

<sup>¶</sup> Young Investigator Group Oxygen Evolution Mechanism Engineering, Helmholtz Zentrum  
Berlin für Materialien und Energie GmbH, Hahn-Meitner-Platz 1, 14109 Berlin, Germany.

This supporting information includes 17 figures and 8 tables.

## Supporting Figures

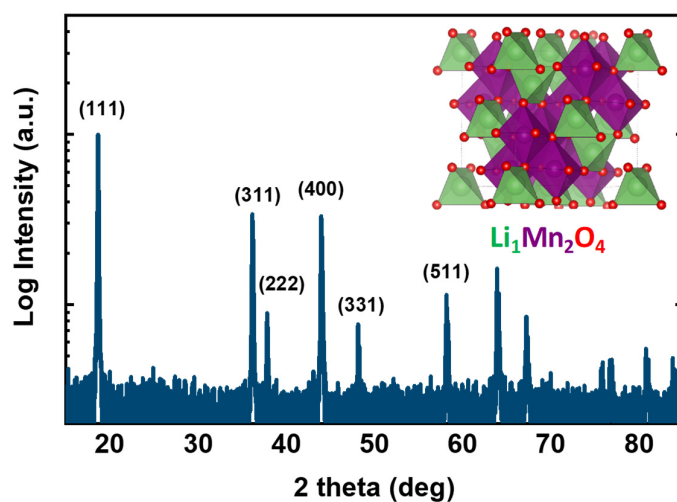

**Figure S1.** Indexed X-ray diffraction pattern of pristine  $\text{LiMn}_2\text{O}_4$  particles (logarithmic scale). The inset shows a cubic spinel crystal structure of  $\text{LiMn}_2\text{O}_4$ .

---

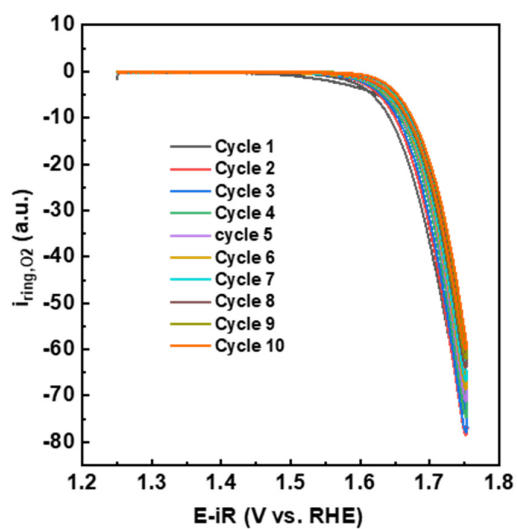

**Figure S2.** As-measured ring current at 0.4 V vs. RHE assigned to oxygen evolution at Pt ring (potential applied at ring is 0.4 V vs RHE) for 1<sup>st</sup> to 10<sup>th</sup> cycle.

---

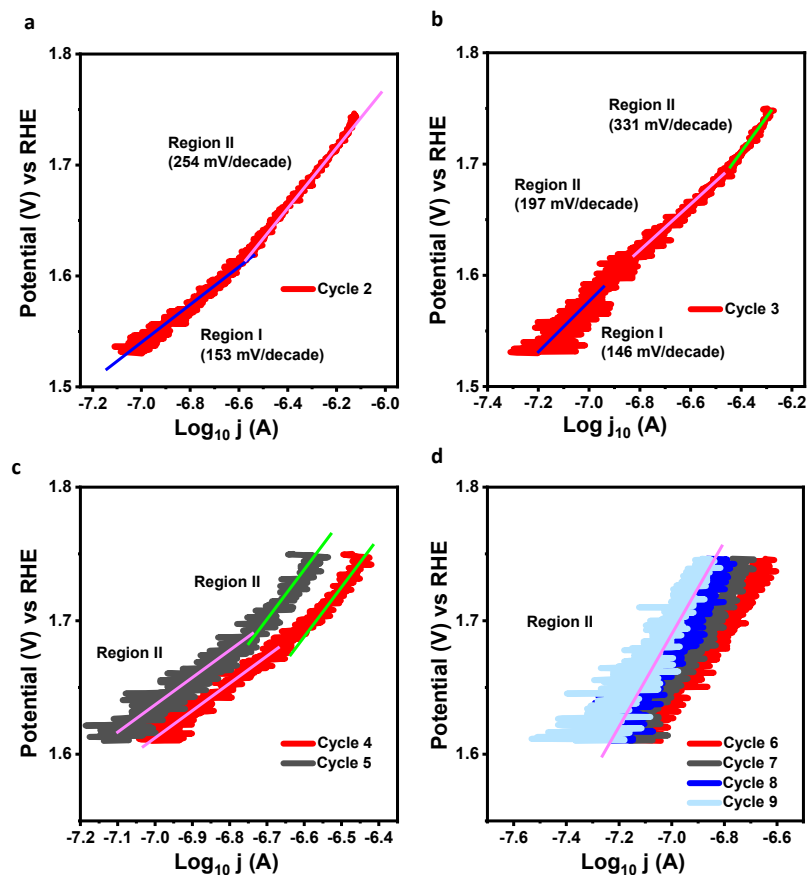

**Figure S3.** (a-d) Tafel slope of 2<sup>nd</sup> to 9<sup>th</sup> anodic cycle of Mn detected at a Pt ring at 1.2 V vs. RHE. Tafel slopes obtained in region I (1.4 < E < 1.6 V vs RHE) and region II (1.6 < E < 1.75 V vs RHE).

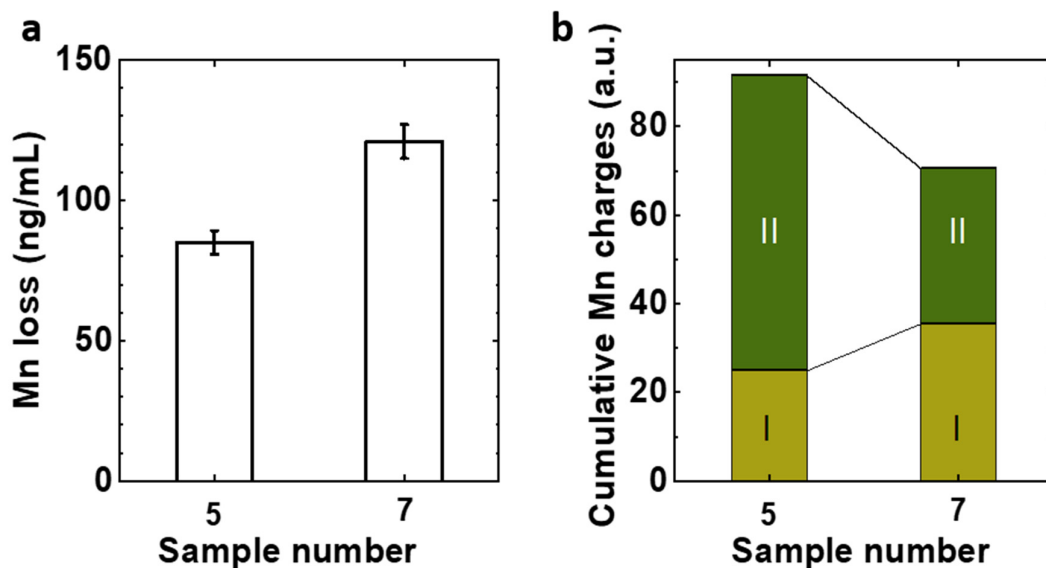

**Figure S4.** (a) Mn loss to electrolyte obtained from ICP-OES. Error bars indicate 5% measurement uncertainty. (b) Total Mn charges from 10 cycles corresponding to without-conditioning and conditioning + post-conditioning Mn dissolution current and different color corresponds to the distinct Mn dissolution process in region I and region II.

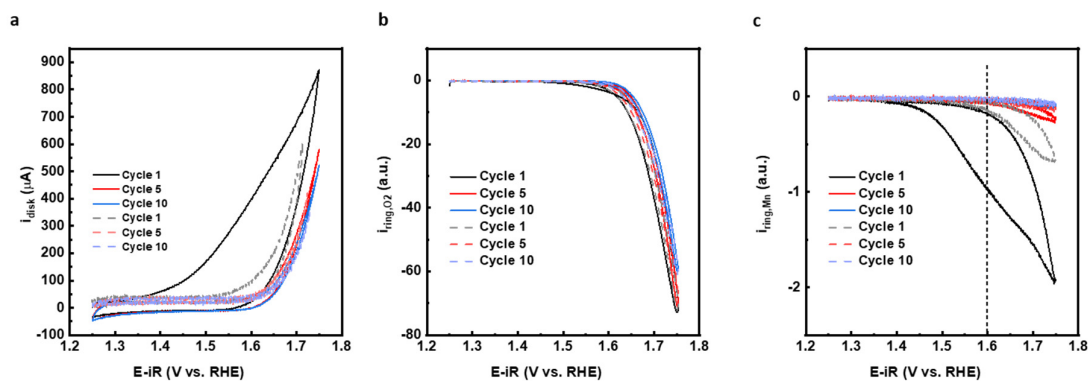

**Figure S5.** (a-c) CV at disk for cycle 1, 5 and 10. (b,c) CV at ring for  $\text{O}_2$  and Mn detection for cycle 1, 5, 10, respectively. Dotted and solid lines showed the CVs with and without conditioning.

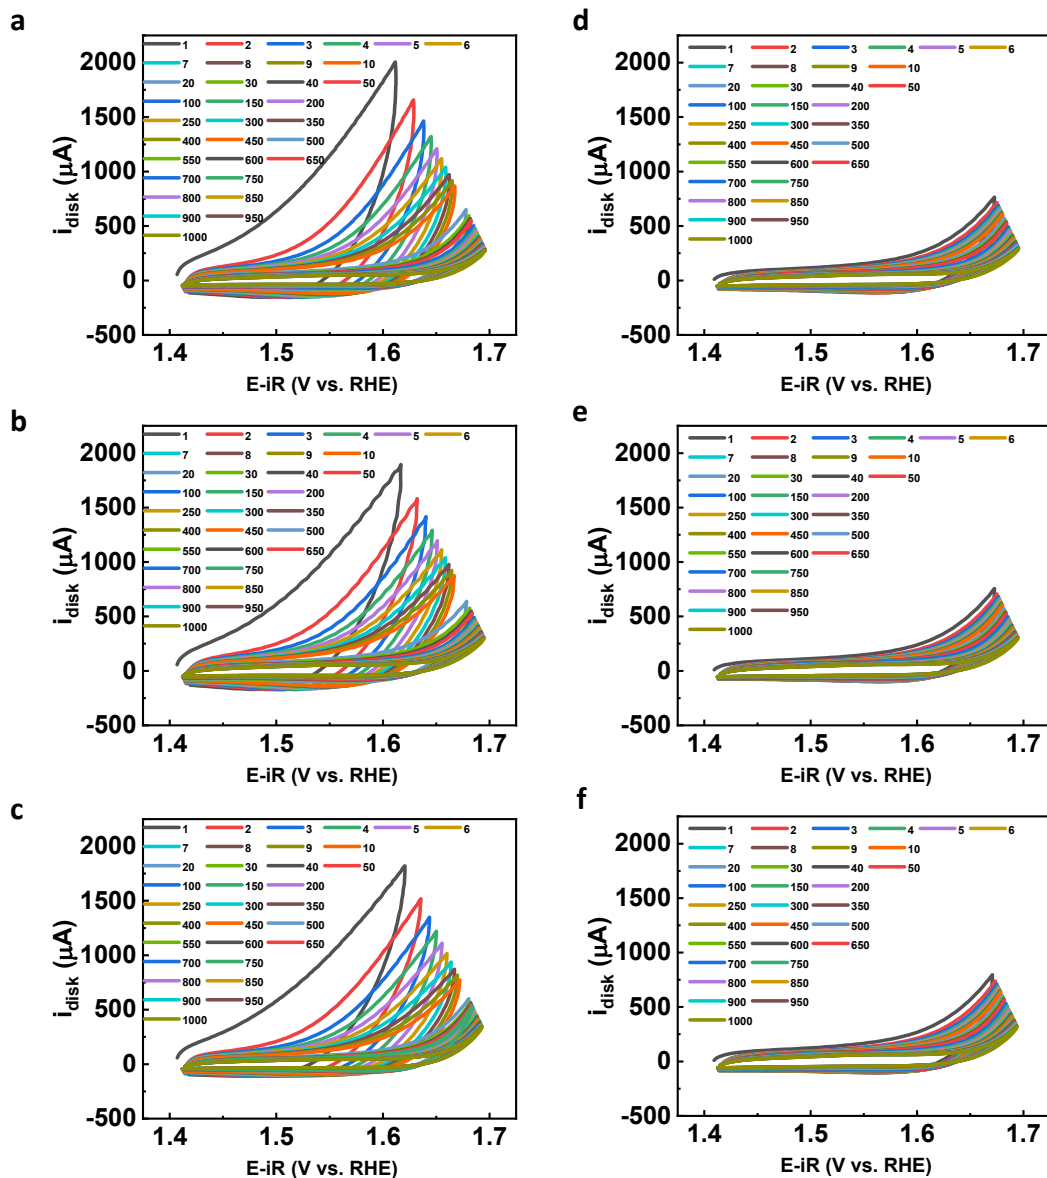

**Figure S6.** (a-c) Long-term tests without and (d-f) after conditioning step for 1000 cycles of  $\text{LiMn}_2\text{O}_4$  with the scan rate of 100 mV/s.

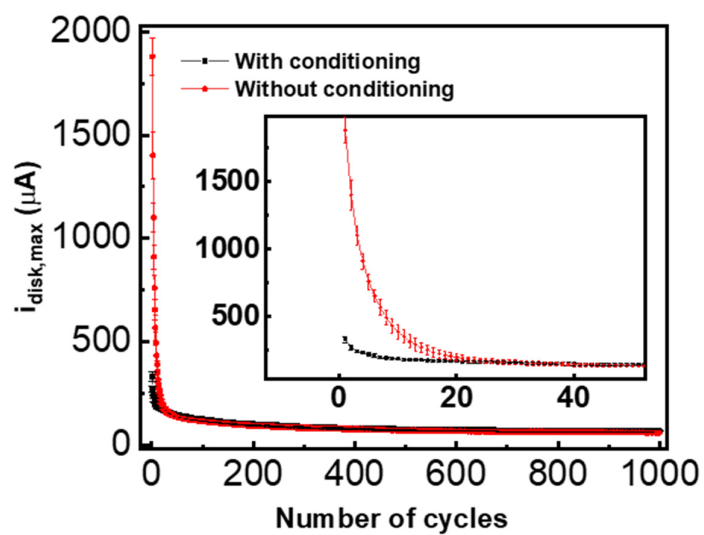

**Figure S7.** Change in maximal disk current density with number of cycles during long-term testing.

---

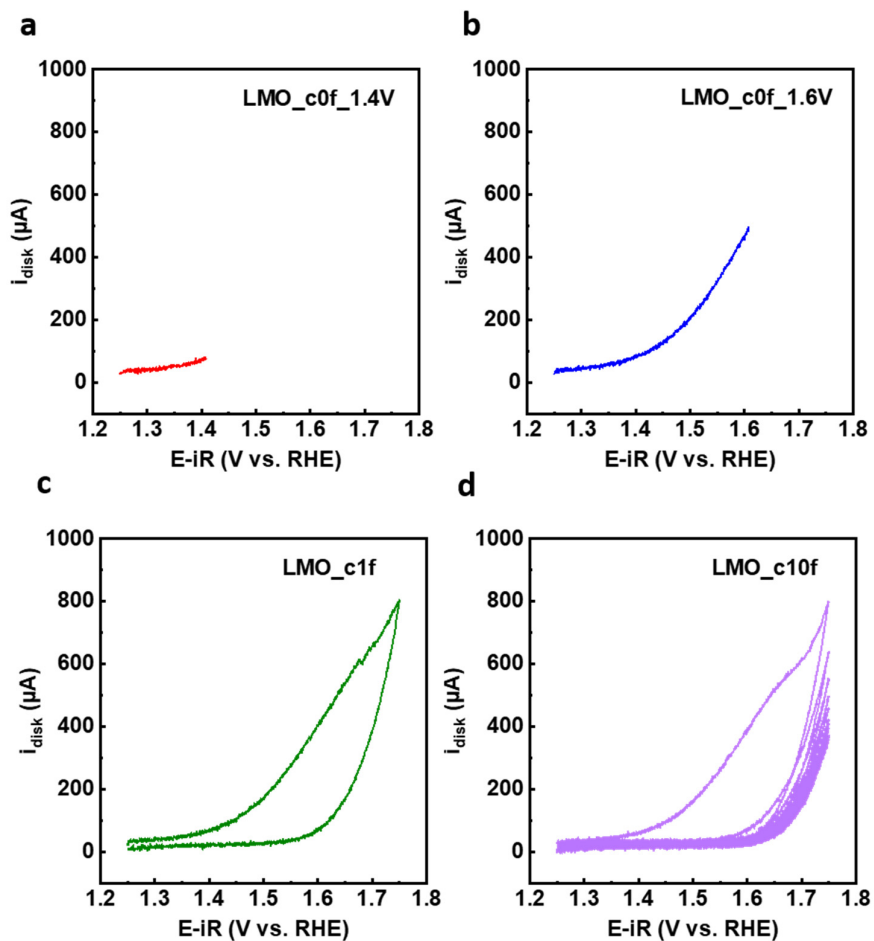

**Figure S8.** Electrochemical measurements for systematic XAS and XPS analysis. (1) LMO\_c0f\_1.4V: drop-casted particles scan up to the potential of 1.4 V vs RHE, (2) LMO\_c0f\_1.6 V: scans up to 1.6 V vs RHE, (3) LMO\_c1f: after completion of 1 potential cycle in the potential range of 1.25-1.75 V vs RHE, (4) LMO\_c10f: after 10 potential cycles in the potential range of 1.25-1.75 V vs RHE.

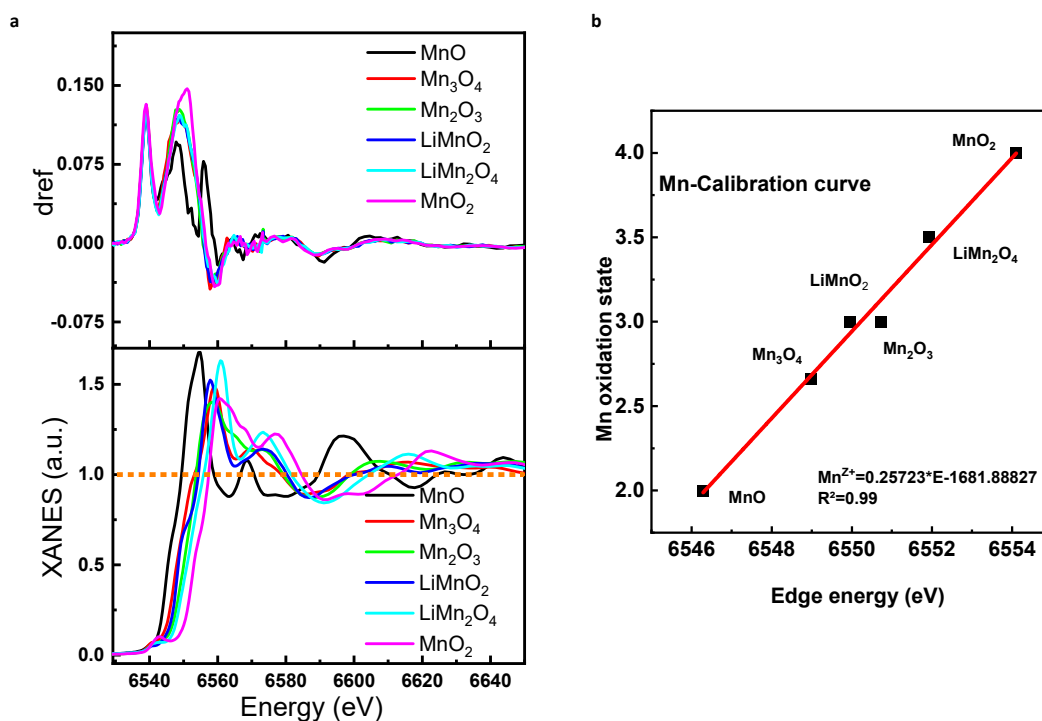

**Figure S9.** Mn-K edge XANES spectra and derivative of Mn reference foil collected during each XAS measurements of Mn-based reference; MnO, Mn<sub>3</sub>O<sub>4</sub>, Mn<sub>2</sub>O<sub>3</sub>, LiMnO<sub>2</sub>, LiMn<sub>2</sub>O<sub>4</sub>, MnO<sub>2</sub>. (b) Mn calibration curve obtained from nominal oxidation state of Mn-references as a function of energy of the Mn-K edge. The estimated oxidation states are shown in Table S2. The edge energy was estimated using the integral method ( $\mu_1=1.00$ ,  $\mu_2=0.20$ ). Dataset available at <https://doi.org/10.5281/zenodo.10391660>.



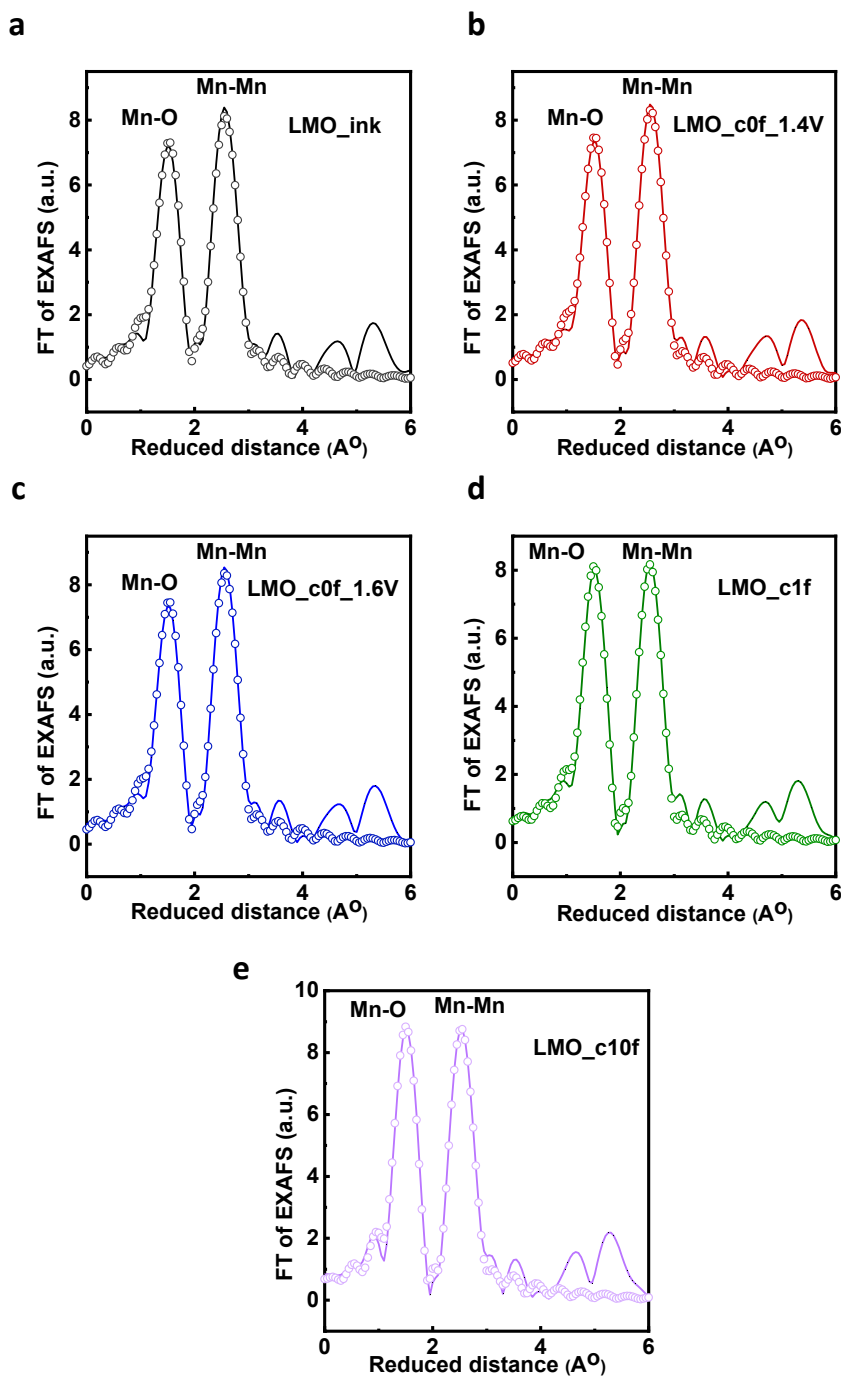

**Figure S10.** (a-e) FT of EXAFS spectra of LMO\_ink and electrochemically processed sample LMO\_c0f\_1.4V, LMO\_c0f\_1.6V, LMO\_c1f and LMO\_c10f at Mn-K edge, where the solid lines represent the measurements and scattered dotted lines are respective EXAFS simulations.

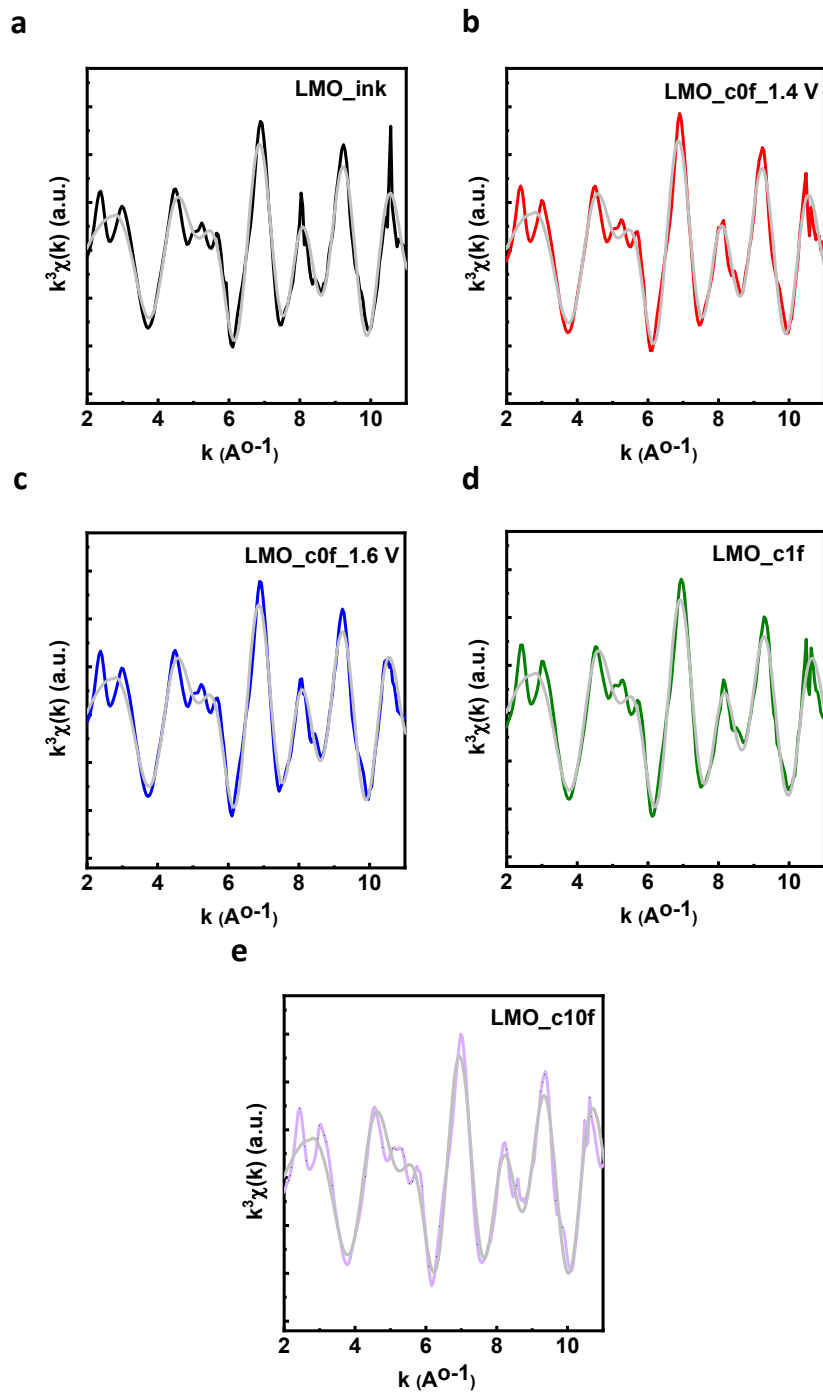

**Figure S11.**  $k^3$ -weighted EXAFS spectra of LMO\_ink and electrochemically processed samples LMO\_c0f\_1.4V, LMO\_c0f\_1.6V, LMO\_c1f and LMO\_c10f recorded at the Mn-K edge. The colorful lines represent the measurements and gray lines are respective EXAFS simulations.

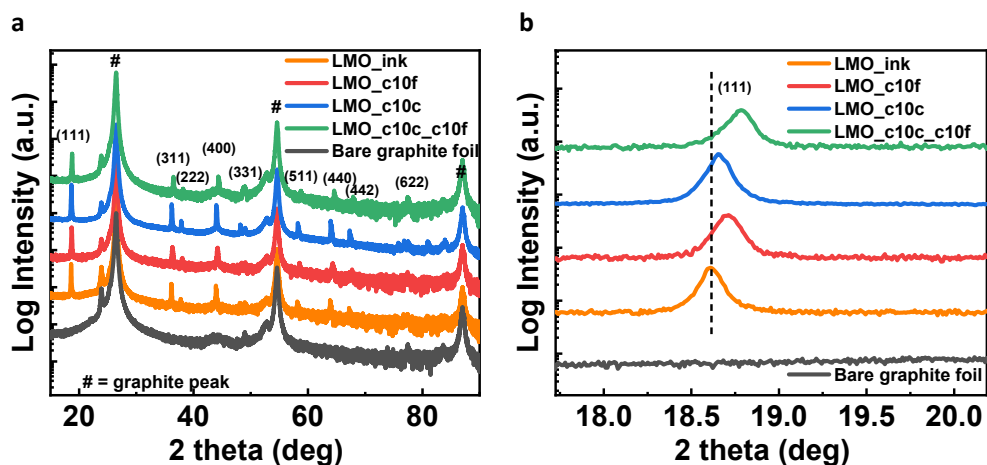

**Figure S12.** (a) X-ray diffraction pattern of LMO\_ink, LMO\_c10f, LMO\_c10c and LMO\_c10c\_c10f and bare graphite foil as a reference. All XRD samples were drop casted on graphite foil. (b) zoomed view of (111) diffraction peak.

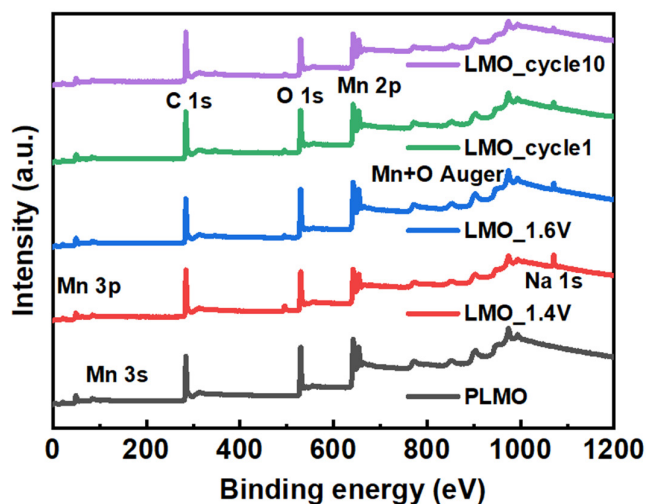

**Figure S13.** XPS survey scans of LMO\_ink and electrochemically processed samples. All samples were drop-casted on glassy carbon disk.

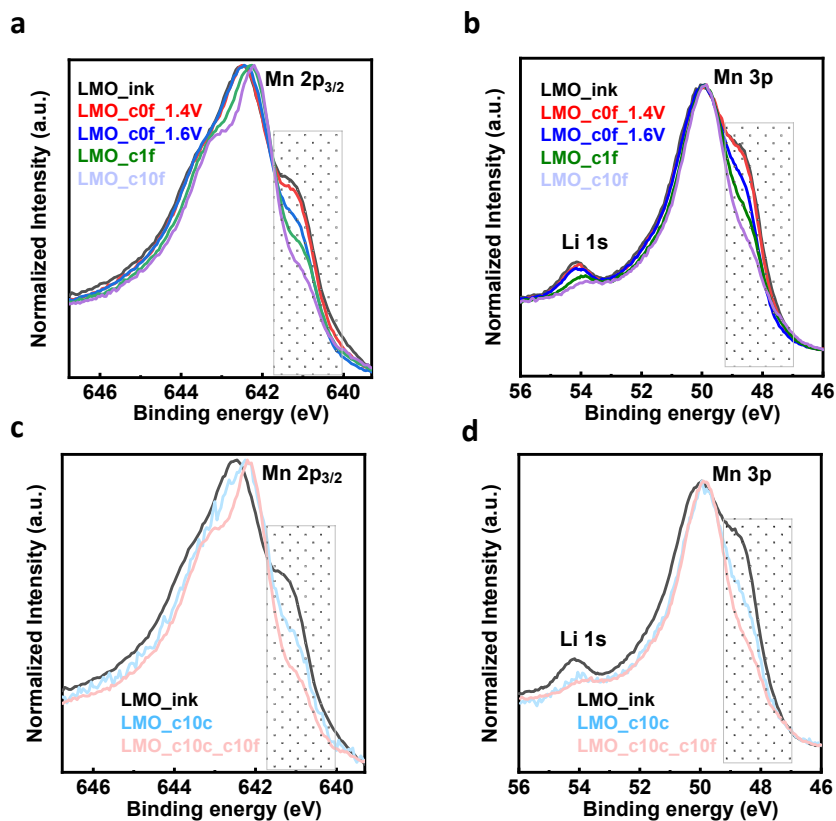

**Figure S14.** (a,b) Mn 2p, Mn 3p and Li 1s (shoulder at higher B.E.) HRXPS of LMO\_ink, LMO\_c0f\_1.4V, LMO\_c0f\_1.6V, LMO\_c1f and LMO\_c10f. (c,d) Mn 2p, Mn 3p and Li 1s (shoulder at higher B.E.) HRXPS of LMO\_ink, LMO\_c10c and LMO\_c10c\_c10f.

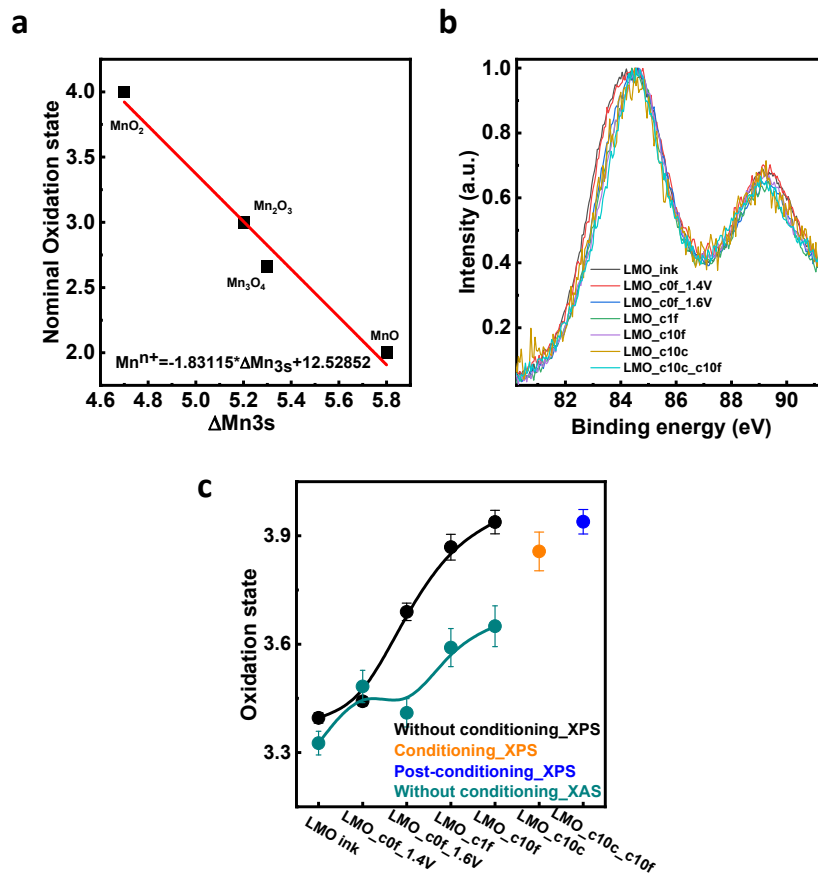

**Figure S15.** (a) Mn calibration curve obtained from nominal oxidation state of Mn-references ( $\text{MnO}$  (+2),  $\text{Mn}_3\text{O}_4$  (+2.66),  $\text{Mn}_2\text{O}_3$  (+3),  $\text{MnO}_2$  (+4)) as a function of difference in Mn 3s multiplet splitting. (b) Mn 3s HRXPS spectra of LMO\_ink and electrochemically processed samples LMO\_c0f\_1.4V, LMO\_c0f\_1.6V, LMO\_c1f, LMO\_c10f, LMO\_c10c and LMO\_c10c\_c10f. (c) Bulk average oxidation state obtained from Mn-K edge XANES spectra and surface oxidation state from Mn 3s HRXPS spectra for all aforementioned samples.

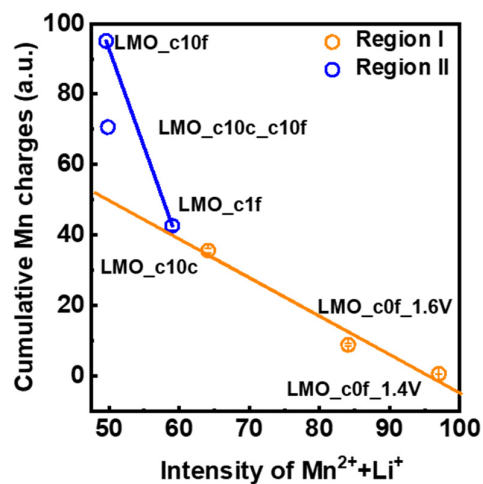

**Figure S16.** Correlation of cumulative Mn charges with intensity of (Mn<sup>2+</sup>+Li<sup>+</sup>) in Region I and Region II.

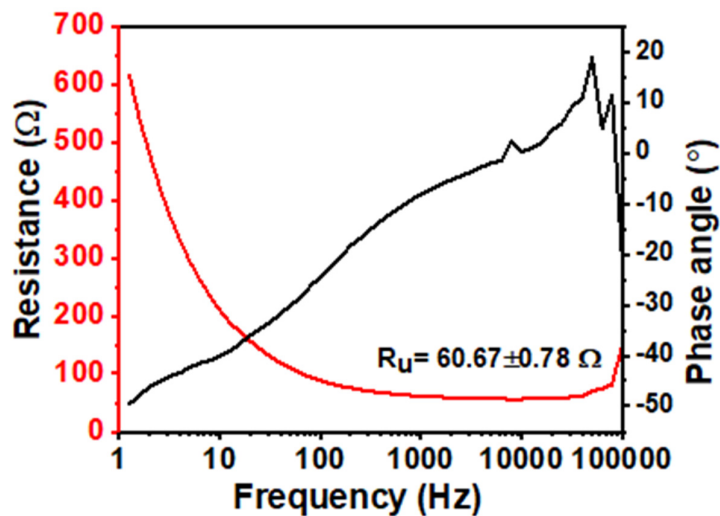

**Figure S17.** EIS spectra showing resistance (red) and phase angle (black) as a function of frequency collected on a LiMn<sub>2</sub>O<sub>4</sub> decorated glassy carbon disk and uncompensated resistance was utilized for the IR correction.

## Supporting Tables

**Table S1.** Averaged Tafel slope values for 1<sup>st</sup> to 10<sup>th</sup> anodic cycle of Mn dissolution current of LMO\_ink observed at Pt ring. The values are the average of three different samples and standard deviation is reported as error.

| Cycle | Region I<br>(1.4<E<1.6) |                   | Region II<br>(1.6<E<1.75 V vs<br>RHE) |                   | Region II<br>(1.6<E<1.7) |                   | Region II<br>(1.7<E<1.75) |                   |
|-------|-------------------------|-------------------|---------------------------------------|-------------------|--------------------------|-------------------|---------------------------|-------------------|
|       | Average<br>(mV/dec)     | Error<br>(mV/dec) | Average<br>(mV/dec)                   | Error<br>(mV/dec) | Average<br>(mV/dec)      | Error<br>(mV/dec) | Average<br>(mV/dec)       | Error<br>(mV/dec) |
| 1     | 139                     | 4                 | 520                                   | 44                |                          |                   |                           |                   |
| 2     | 149                     | 5                 | 254                                   | 10                |                          |                   |                           |                   |
| 3     | 146                     | 13                | 229                                   | 3                 | 198                      | 2                 | 331                       | 21                |
| 4     |                         |                   | 223                                   | 1                 | 193                      | 2                 | 292                       | 33                |
| 5     |                         |                   | 231                                   | 4                 | 194                      | 8                 | 255                       | 16                |
| 6     |                         |                   | 239                                   | 6                 |                          |                   |                           |                   |
| 7     |                         |                   | 237                                   | 8                 |                          |                   |                           |                   |
| 8     |                         |                   | 253                                   | 8                 |                          |                   |                           |                   |
| 9     |                         |                   | 246                                   | 7                 |                          |                   |                           |                   |
| 10    |                         |                   | 243                                   | 1                 |                          |                   |                           |                   |

**Table S2.** Averaged Tafel slope values for 1<sup>st</sup> to 10<sup>th</sup> anodic cycle of Mn dissolution current of LMO\_ink during conditioning step (in the potential window of 1.25-1.6 V vs RHE). Tafel slope were plotted in region I (1.4 < E < 1.6 V vs RHE). The values are the average of three different samples and standard deviation is reported as error.

| Cycle | Region I (1.4<E<1.6) |                |
|-------|----------------------|----------------|
|       | Average (mV/dec)     | Error (mV/dec) |
| 1     | 144                  | 8              |
| 2     | 129                  | 0.5            |
| 3     | 130                  | 4              |
| 4     | 114                  | 14             |
| 5     | 120                  | 3              |
| 6     | 112                  | 5              |
| 7     | 122                  | 3              |
| 8     | 115                  | 7              |
| 9     | 102                  | 9              |
| 10    | 98                   | 0.4            |



**Table S3.** Averaged Tafel slope values for 1<sup>st</sup> to 10<sup>th</sup> anodic cycle of Mn dissolution current of LMO\_ink after conditioning step observed at Pt ring (in the potential window of 1.6-1.75 V vs RHE). The values are the average of three different samples and standard deviation is reported as error.

| Cycle | Region II<br>(1.6<E<1.75 V vs<br>RHE) |                   | Region II<br>(1.6<E<1.7) |                   | Region II<br>(1.7<E<1.75) |                   |
|-------|---------------------------------------|-------------------|--------------------------|-------------------|---------------------------|-------------------|
|       | Average<br>(mV/dec)                   | Error<br>(mV/dec) | Average<br>(mV/dec)      | Error<br>(mV/dec) | Average<br>(mV/dec)       | Error<br>(mV/dec) |
| 1     | 194                                   | 16                | 165                      | 13                | 328                       | 26                |
| 2     | 205                                   | 16                | 171                      | 16                | 257                       | 20                |
| 3     | 219                                   | 16                | 171                      | 11                | 215                       | 25                |
| 4     | 209                                   | 20                | 162                      | 16                | 202                       | 16                |
| 5     | 214                                   | 27                |                          |                   |                           |                   |
| 6     | 196                                   | 21                |                          |                   |                           |                   |
| 7     | 189                                   | 20                |                          |                   |                           |                   |
| 8     | 196                                   | 2                 |                          |                   |                           |                   |
| 9     | 167                                   | 17                |                          |                   |                           |                   |
| 10    | 173                                   | 1                 |                          |                   |                           |                   |

**Table S4.** The Mn charge passed corresponding to Mn ring current in 1.25-1.75 V vs RHE with and without conditioning step, where conditioning step is the 10 CV in the potential window of 1.25-1.6 V vs RHE. The Mn charge has been evaluated from Figure 1b (without-conditioning), Figure 2a (during conditioning step) and Figure 2c (post-conditioning).

| Cycles              | Mn charge ( $\mu\text{F}$ ) in 1.25-1.75 V (without-conditioning) |                                                 | Mn charge ( $\mu\text{F}$ ) in 1.25-1.75 V (with activation step) |                                              |
|---------------------|-------------------------------------------------------------------|-------------------------------------------------|-------------------------------------------------------------------|----------------------------------------------|
|                     | Mn charge in 1.25-1.6 V (without-conditioning)                    | Mn charge in 1.25-1.75 V (without-conditioning) | Mn charge in 1.25-1.6 V (during conditioning)                     | Mn charge in 1.25-1.75 V (post-conditioning) |
| 1                   | 1.13E-05                                                          | 4.27E-05                                        | 1.13E-05                                                          | 1.16E-05                                     |
| 2                   | 3.78E-06                                                          | 1.53E-05                                        | 5.79E-06                                                          | 5.17E-06                                     |
| 3                   | 2.06E-06                                                          | 8.48E-06                                        | 3.83E-06                                                          | 3.55E-06                                     |
| 4                   | 1.64E-06                                                          | 5.96E-06                                        | 3.01E-06                                                          | 2.84E-06                                     |
| 5                   | 1.18E-06                                                          | 4.50E-06                                        | 2.49E-06                                                          | 2.51E-06                                     |
| 6                   | 1.17E-06                                                          | 3.75E-06                                        | 2.23E-06                                                          | 2.33E-06                                     |
| 7                   | 9.43E-07                                                          | 3.05E-06                                        | 2.05E-06                                                          | 2.08E-06                                     |
| 8                   | 9.11E-07                                                          | 2.76E-06                                        | 1.76E-06                                                          | 1.95E-06                                     |
| 9                   | 1.10E-06                                                          | 2.59E-06                                        | 1.66E-06                                                          | 1.73E-06                                     |
| 10                  | 1.03E-06                                                          | 2.42E-06                                        | 1.51E-06                                                          | 1.34E-06                                     |
| <b>Total charge</b> | <b>2.51E-05</b>                                                   | <b>9.15E-5</b>                                  | <b>3.56E-5</b>                                                    | <b>3.50E-5</b>                               |
|                     |                                                                   |                                                 | <b>3.44E-5 + 3.75E-5 = 7.06E-5</b>                                |                                              |

**Without conditioning**

Charge in Region I=2.51 e-05  $\mu\text{F}$ , Charge in Region II=6.64 E-05  $\mu\text{F}$

**With conditioning**

Charge in Region I=3.56 e-05  $\mu\text{F}$ , Charge in Region II=3.50 E-05  $\mu\text{F}$

% change in charge in Region II= ((6.64 E-05  $\mu\text{F}$ –3.50 E-05  $\mu\text{F}$ ) / 6.64 E-05  $\mu\text{F}$ ) \*100 = ~ 47.29%

% change in total charge = ((9.15 E-05  $\mu\text{F}$ –7.06 E-05  $\mu\text{F}$ ) / 9.15 E-05  $\mu\text{F}$ ) \*100 = ~ 23%

**Table S5.** The Cumulative Mn charge passed corresponding to Mn ring current for without-conditioning, during conditioning, post-conditioning and (during conditioning + post-conditioning) experiments, where conditioning step is the 10 CV in the potential window of 1.25-1.6 V vs RHE. The Mn charge has been evaluated from Figure 1b (without-conditioning), Figure 2a (during conditioning step) and Figure 2c (post-conditioning).

| Cycles | Cumulative Mn charges ( $\mu\text{F}$ ) |                     |                   |                                         |
|--------|-----------------------------------------|---------------------|-------------------|-----------------------------------------|
|        | Without-conditioning                    | During conditioning | Post-conditioning | During conditioning + Post-conditioning |
| 1      | 4.27E-05                                | 1.13E-05            | 1.16E-05          | 4.72E-05                                |
| 2      | 5.80E-05                                | 1.71E-05            | 1.67E-05          | 5.23E-05                                |
| 3      | 6.64E-05                                | 2.09E-05            | 2.03E-05          | 5.59E-05                                |
| 4      | 7.24E-05                                | 2.39E-05            | 2.31E-05          | 5.87E-05                                |
| 5      | 7.69E-05                                | 2.64E-05            | 2.56E-05          | 6.12E-05                                |
| 6      | 8.06E-05                                | 2.86E-05            | 2.79E-05          | 6.35E-05                                |
| 7      | 8.37E-05                                | 3.07E-05            | 3.00E-05          | 6.56E-05                                |
| 8      | 8.65E-05                                | 3.24E-05            | 3.20E-05          | 6.76E-05                                |
| 9      | 8.90E-05                                | 3.41E-05            | 3.37E-05          | 6.93E-05                                |
| 10     | 9.15E-05                                | 3.56E-05*           | 3.50E-05          | 7.06E-05                                |

Cumulative Mn charges for cycle  $x$  ( $1 \leq x \leq 10$ ) = sum of the charges of (cycle 1+ ... + cycle(x-1) + cycle x)

Cumulative Mn charges corresponding to (during conditioning + post-conditioning) for cycle  $x$  ( $1 \leq x \leq 10$ ) = Total charges in 10 cycles during conditioning (value marked by asterisk) + cumulative charges of cycle  $x$  for post-conditioning.

**Table S6.** Edge energy and Mn nominal oxidation state obtained from Mn K-edge XANES spectra of LMO\_ink and electrochemically processed samples. The fit equation and graph are shown in Figure S6.

| <b>Sample</b> | <b>Edge energy (eV)</b> | <b>Oxidation state</b> |
|---------------|-------------------------|------------------------|
| LMO_ink       | 6551.4                  | 3.33 (3)               |
| LMO_c0f_1.4V  | 6551.99                 | 3.48 (4)               |
| LMO_c0f_1.6V  | 6551.71                 | 3.41 (4)               |
| LMO_c1f       | 6552.47                 | 3.60 (5)               |
| LMO_c10f      | 6552.60                 | 3.64 (6)               |

**Table S7:** EXAFS absorber-scatter averaged interatomic distance (R), co-ordination number

| Sample                 | Parameter | Mn-O   | Mn-Mn  | S0 <sup>2</sup> | R-factor |
|------------------------|-----------|--------|--------|-----------------|----------|
| <b>1: LMO_ink</b>      | <i>N</i>  | 6      | 6      | 0.533           | 0.80%    |
|                        | R (Å)     | 1.899  | 2.898  |                 |          |
|                        | σ (Å)     | 0.0574 | 0.0589 |                 |          |
| <b>2: LMO_c0f_1.4V</b> | <i>N</i>  | 6      | 6      | 0.575           | 0.54%    |
|                        | R (Å)     | 1.898  | 2.896  |                 |          |
|                        | σ (Å)     | 0.063  | 0.0627 |                 |          |
| <b>3: LMO_c0f_1.6V</b> | <i>N</i>  | 6      | 6      | 0.566           | 0.54%    |
|                        | R (Å)     | 1.899  | 2.896  |                 |          |
|                        | σ (Å)     | 0.0614 | 0.061  |                 |          |
| <b>4: LMO_c1f</b>      | <i>N</i>  | 6      | 6      | 0.597           | 0.52%    |
|                        | R (Å)     | 1.893  | 2.876  |                 |          |
|                        | σ (Å)     | 0.0597 | 0.0683 |                 |          |
| <b>5: LMO_c10f</b>     | <i>N</i>  | 6      | 6      | 0.575           | 0.60%    |
|                        | R (Å)     | 1.890  | 2.861  |                 |          |
|                        | σ (Å)     | 0.0488 | 0.0625 |                 |          |

(*N*) and Debye-Waller factor ( $\sigma$ ) as determined by simulation of the *k*<sup>3</sup>-weighted EXAFS spectra at the Mn K edge for LMO\_ink and electrochemically processed samples LMO\_c0f\_1.4V, LMO\_c0f\_1.6V, LMO\_c1f and LMO\_c10f. R-factor and amplitude reduction factor (S0<sup>2</sup>) are also listed in table.

The number of interactions *N* was fixed to 6.

**Table S8.**  $\Delta E_{Mn3s}$  and Mn surface oxidation state obtained from Mn 3s HRXPS spectra of LMO\_ink and electrochemically processed samples. The fit equation and graph are shown in Figure S11.

| <b>Sample</b> | <b><math>\Delta E_{Mn3s}</math></b> | <b>Oxidation state</b> |
|---------------|-------------------------------------|------------------------|
| LMO_ink       | 4.99                                | 3.39 (1)               |
| LMO_c0f_1.4V  | 4.96                                | 3.44 (1)               |
| LMO_c0f_1.6V  | 4.83                                | 3.69 (2)               |
| LMO_c1f       | 4.73                                | 3.87 (3)               |
| LMO_c10f      | 4.69                                | 3.94 (3)               |
| LMO_c10c      | 4.74                                | 3.86 (5)               |
| LMO_c10c_c10f | 4.69                                | 3.94 (3)               |
